# Supplementary material for: Early Life Stress Modulates Sexual Orientation via Oxytocin and Arginine Vasopressin
Source: Research Square preprint supplement (doi:10.21203/rs.3.rs-3275501/v1), 2023-08-21
Supplement: Supplementary file 1 [file 13d2a13927136d9e331138fd.docx]

**Early Life Stress Modulates** **Sexual Orientation via Oxytocin and** **Arginine Vasopressin**

**Supplementary data**

**Content table**

[**Supplementary methods ....................................................................................................................... 2**](#methods)

[**Reference................................................................................................................................................. 6**](#Reference)

[**Supplementary table** **............................................................................................................................. 7**](#st)

[**Supplementary figure ........................................................................................................................... 8**](#sf)

Methods

Ethics

This study was approved by the Ethics Committee of the First Hospital of Hebei Medical University (20210686). The trial was registered with the China Clinical Trial Center ChiCTR-TRC-2100052548. All participants provided written informed consent.

Participants

The participant eligibility criteria are as follows: (1) cases comprising an age range of 18–38 years; (2) gay/bisexual men who scored 2–6 and heterosexual men who scored 0 on the Kinsey scale; (3) individuals who finished the interview including three dimensions of sexual preference (sexual behavior, fantasy, romantic attraction) from 15 years of age till date, over at least a 3 year period. Participants were met at CDC by a researcher and a phlebotomist. First, participants completed a consent form. Five milliliters of whole blood were collected in blood collection tubes (no additives) from each human participant. Whole blood were obtained from 82 human subjects (30 heterosexual men and 52 gay/bisexual men, healthy, and HIV negative). Participants were then compensated financially.

Study design and Procedures

We designed the present study to assess the efficacy of OT or AVP in a mice model of ELS-induced lower opposite-sex preferences and in patients with childhood trauma. We performed the mice study in accordance with the Animal Care and Use Committee of the First Hospital of Hebei Medical University.

The human study is provided in table 1, 2 and figure 1. A total of 32 heterosexual men and 57 gay/bisexual men were included in the analysis. Before the start of the interview, participants signed an informed consent form.

The mice experiments is provided in figure 2-4. In figure 2A, developmental mice were exposed to CUMS from postnatal day (PND) 21 to PND 35 (weaning stress, W-S) or PND 36 to PND 50 (puberty stress, P-S), followed by a battery of behavioral tests during adulthood. In figure 3A, male mice were randomly categorized into four groups: control group (CON); W-S group that underwent a 2-week CUMS procedure during weaning; OT-S group that underwent a 2-week CUMS procedure during weaning and received OT (0.5 mg/kg, i.p) administration during the CUMS procedure; and S-OT group that underwent a 2-week CUMS procedure during weaning and received OT (0.5 mg/kg, i.p) administration before behavioral tests each time. We then used the SIT to assess social interaction, SPT, and BPT to assess sexual preference, OFT to assess anxiety-like behaviors, and forced swimming test (FST) to assess depression-like behaviors. In figure 4A, male mice were randomly divided into four groups, AVP was administered at 0.01 mg/kg (i. p.), the rest of the procedure was followed as above.

We used a t-test for statistical comparisons between the two groups. χ2 tests were used to compare group differences in categorical variables. CTQ scores were applied to the Shapiro–Wilk normality test and compared using the Mann–Whitney-U test, which is presented as the median (25–75th percentile). The correlation between OT or AVP level and Kinsey score was evaluated using Spearman’s correlation method. One-way analysis of variance (ANOVA) and post-hoc Dunnett’s multiple comparisons test were used to evaluate the significance of intergroup differences in mice. Data from mice are shown as the mean ± SEM. All results were analyzed using GraphPad Prism version 8.0. p < 0.05 was considered as significant.

General Protocol

The research ethics board of the Ethics Committee of the first hospital of Hebei Medical University approved this study. Upon a 5-minute study explanation, eligible participants were completed the semi-structured in-depth interview, a self-made general questionnaire, Kinsey scale, childhood trauma questionnaire (CTQ) and symptom checklist 90 (SCL-90) at the local Centers for Disease Control.

Clinical interview

Participants were interviewed individually by trained interviewers. The questionnaire assessed factors such as demographic characteristics, occupation, sexual orientation, socioeconomic, substance use (e.g., alcohol, tobacco use), psychiatric history, interpersonal, and trauma experience.

Kinsey scale

Outcomes of each sexual orientation were identified by Kinsey scale (0=maximally heterosexual, 6=maximally homosexual). The gay/bisexual men all scored 2-6 and the heterosexual men 0 on the Kinsey heterosexual/homosexual scale. In addition to scoring themselves on the Kinsey scale (which is based on self-identification). The subjects also participated in interviews regarding three dimensions of sexual orientation (fantasy, romantic attraction, and sexual behavior) over consecutive 3-year historical time periods, from age 15 to the present.

Childhood Trauma Questionnaire (CTQ)

CTQ (28 item version) was completed by 89 individuals. The CTQ yields scores for five traumas experienced in childhood: physical abuse, physical neglect, emotional abuse, emotional neglect and sexual abuse, as well as a total score. Reliability and validity of the CTQ has been demonstrated. The total CTQ score ranges from 25 to 125.

Symptom Checklist-90 (SCL-90)

SCL-90 is a measure of psychological state. The SCL-90is a frequently used 90-item self-report symptom inventory using a 5-point scale, how much a certain problem has bothered the subject over the past 7 days. This allows nine scales to be derived, namely somatization, obsessive-compulsive, interpersonal sensitivity (feelings of personal inadequacy and inferiority), depression, anxiety, hostility, phobic anxiety, paranoid ideation, and psychoticism.

Psychiatric status was evaluated by the validated Chinese version of SCL-90, which is a self-administered scale consisting of 90 items in 9 domains: somatization, obsessive-compulsiveness, interpersonal sensitivity, depression, anxiety, hostility, phobic anxiety, paranoid ideation, and psychoticism. Each item scored from 1 to 5 (0 = not at all, 1 = a little bit, 2 = moderately, 3 = quite a bit, 4 = extremely) and assess mental health issues in the last 7 days.

The Cronbach’s α was above 0.69 for SCL-90 subscores.

Chronic unpredictable mild stress (CUMS)

The procedure of CUMS was adapted from the former described and revised1. Mice were stimulated for 2 weeks with two of the nine stressors daily. The nine stressors of the CUMS procedure were as follows: (i) 2 h cage tilt (60°), (ii) 24 h of exposure to an empty cage, (iii) 12 h water deprivation, (iv) 12 h food deprivation, (v) 2 h of physical restraint, (vi) 5 min of forced cold swimming, (vii) 0.7 mA electric shock (WAN lasting 1 s, PUB lasting 2 s), (viii) crowding for 12 h, and (ix) tail clamp for 1 min. Control mice were housed under normal conditions without exposure to stress in their cages.

Drug administration

OT (S80757, Shyuanye, Shanghai, China) and AVP (HY-P0049, Med Chem Express, NJ, USA) were dissolved in 0.9% saline according to the manufacturer’s instructions. Mice were injected intraperitoneally with OT (0.2 mL, 0.5 mg/kg) or AVP (0.2 mL, 0.01 mg/kg) daily at the same time for 14 days. Drug dosage and methods were determined according to previous studies2-4.

Blood Sample Collection

Participants were met at CDC by a researcher and a phlebotomist. First, participants completed a consent form. Five milliliters of whole blood were collected in blood collection tubes (no additives) from each human participant. Whole blood were obtained from 82 human subjects (30 heterosexual men and 52 gay/bisexual men, healthy, and HIV negative). Participants were then compensated financially. All the whole-blood sample was processed in our laboratory after extraction, typically within 3–4 h. The tube and its contents were centrifuged without braking at 4,000 rpm for 10 min at 4 °C. After centrifugation, the upper serum layer was carefully extracted into 2 mL aliquots and stored at −80 °C until ELISAs were conducted.

As for the mice, post behavioral tests, approximately 1 mL of blood was collected by removing the eyeball. The blood sample was then centrifuged at 4,000 rpm for 10 min at 4 °C to obtain serum. Serum samples were stored at −80 °C until the time of use.

Enzyme linked immunosorbent assay (ELISA)

Serum samples were thawed on ice and ELISA was performed according to the manufacturer’s instructions. OT and AVP levels in participants’ serum samples were tested using human OT and AVP ELISA kits (Human OT ELISA Kit, Cat: # ml160460-C; Human AVP ELISA Kit, Cat: # m121731-C; Shanghai Meilian). OT and AVP levels in mouse serum samples were tested using mouth OT and AVP ELISA kits (Mouse OT ELISA Kit, Cat: # ml002099; Mouse VP ELISA Kit, Cat: # ml122978 Shanghai Meilian). Optical density (OD) was measured using a microplate reader (CMax Plus, Molecular Devices, Shanghai, China) at a wavelength of 450 nm.

Sexual preference test (SPT)

The SPT was conducted as previously reported and revised5, 6. The test for sexual preference was performed using a three-chamber paradigm. Both test and stimulus mice were of the same age. The test mice were individually placed in the three-chamber apparatus for 5 min to habituate them to the environment, following which the test commenced. Next, the test mice were placed in the central chamber and allowed to move freely to explore. The stimulus mice (an unfamiliar male mouse and an unfamiliar female mouse) were placed in an iron cage on each side of the three chambers. Both test and stimulus mice could exchange tactile and visual signals. The amount of time spent by the test mice exploring the stimulus mice was recorded. The entire SPT experiment lasted 5 min. After each exploration, 75% alcohol was used to clean the chambers. Sexual preference was calculated using the following formula: (time exploring the unfamiliar female mouse–time exploring the male mouse)/(time exploring the unfamiliar female mouse + time exploring the male mouse) × 100. Sniffing time was calculated using the following formula: time spent exploring the unfamiliar female mouse + time exploring the male mouse.

Bedding preference test (BPT)

The BPT was conducted as previously reported and revised5, 6. Similar to SPT, a test for sexual preference was performed in the three-chamber paradigm. Test mice were individually placed in the three-chamber apparatus for 5 min to habituate to the environment before beginning the test. Next, the test mice were placed in the central chamber and allowed to move freely to explore. The bedding (bedding from strange male mice and bedding from strange female mice) was placed in an iron cage on each side of the three-chamber. It is important to note that bedding must be harvested from the home cages of sexually mature mice. The entire BPT experiment lasted 5 min. The time that the test mice spent exploring the bedding in each cage was recorded. After each exploration, 75% alcohol was used to clean the chambers. The female bedding preference index was calculated using the following formula: (time exploring female bedding–time exploring male bedding)/(time exploring female bedding + time exploring male bedding) × 100%. Sniffing time was calculated using the following formula: time spent exploring the unfamiliar female mouse + time exploring the male mouse.

Social interaction test (SIT)

The SIT was conducted as previously reported and revised7, 8. Similar to the SPT, a test for preference of the same species was performed in the three-chamber paradigm. Both test and stimulus mice were of the same age. The test mice were individually placed in the three-chamber apparatus for 5 min to habituate them to the environment after which the test commenced. Next, the test mice were placed in the central chamber and allowed to move freely to explore. Stimulus mice (an unfamiliar same-age and sex mouse with no treatment) were placed in an iron cage on one side of the three-chamber, and an empty wire cage in another chamber. The entire SIT experiment lasted 5 min. The time that the test mice spent exploring each enclosure cage was recorded. After each exploration, 75% alcohol was used to clean the chambers. The social interaction index was calculated using the following formula: (time exploring the same species cage − time exploring the empty cage)/(time exploring the same species cage + time exploring the empty cage) × 100%. The sniffing time was calculated using the following formula: time spent exploring the same species cage + time spent exploring the empty cage.

Open Field Test (OFT)

To measure spontaneous activity and anxiety-like behavior in mice, we used a video tracking system (Smart 3.0.02) to record their behavior when they explored an open-field plastic chamber (40 cm length × 30 cm height × 40 cm width) 9, 10. The mice were placed in the area/chamber for 5 min. The duration of time spent in the center zone (20 cm × 20 cm) was recorded as an index of anxiety-like behavior, and the total distance was measured as an index of spontaneous activity.

Novelty-suppressed feeding test (NSF)

The NSF test uses the conflict between the mice’s desire to eat and their fear of venturing into the central area. The test was conducted as reported and revised in previous studies9, 10. Food and water were withheld from the mice for 24 h before the behavioral test. The device is similar to that of the plastic chamber in the OFT. At the start of the experiment, the mice were placed in a corner of the plastic chamber and their heads were directed toward the center point. A grain of food was placed at the center of the experimental area. The latency (in seconds) to begin eating was recorded (maximum time, 5 min). Next, the consumption of food by each mouse was recorded for 10 min to counteract the effects of appetite.

Forced swimming test (FST)

The FST was conducted as previously described to evaluate depression-like behaviors 11, 12. Mice were individually placed in a glass cylinder (height 30 cm, diameter 12 cm), which was filled with 24 ± 1 °C water to a depth of 15 cm. The mice could not see each other during the FST. The test period of mice forced to swim lasted 6 min. The latency to immobility was measured during the first 2 min. The immobility time was measured over the last 4 min. After each trial round, the water was replaced.

**Reference**

1. Antoniuk S, Bijata M, Ponimaskin E, Wlodarczyk J. Chronic unpredictable mild stress for modeling depression in rodents: Meta-analysis of model reliability. *Neurosci Biobehav Rev* 2019; **99:** 101-116.

2. Smith AS, Korgan AC, Young WS. Oxytocin delivered nasally or intraperitoneally reaches the brain and plasma of normal and oxytocin knockout mice. *Pharmacol Res* 2019; **146:** 104324.

3. An X, Sun X, Hou Y, Yang X, Chen H, Zhang P *et al.* Protective effect of oxytocin on LPS-induced acute lung injury in mice. *Sci Rep* 2019; **9**(1)**:** 2836.

4. Ramos L, Hicks C, Caminer A, McGregor IS. Inhaled vasopressin increases sociability and reduces body temperature and heart rate in rats. *Psychoneuroendocrinology* 2014; **46:** 46-51.

5. Ryan K, Thompson L, Mendoza PA, Chadman KK. Inbred strain preference in the BTBR T+ Itpr3tf/J mouse model of autism spectrum disorder: Does the stranger mouse matter in social approach? *Autism Research* 2019; **12**(8)**:** 1184-1191.

6. Portillo W, Paredes RG. Sexual and olfactory preference in noncopulating male rats. *Physiol Behav* 2003; **80**(1)**:** 155-162.

7. Kaidanovich-Beilin O, Lipina T, Vukobradovic I, Roder J, Woodgett JR. Assessment of social interaction behaviors. *J Vis Exp* 2011; (48).

8. Krishnan V, Han MH, Graham DL, Berton O, Renthal W, Russo SJ *et al.* Molecular adaptations underlying susceptibility and resistance to social defeat in brain reward regions. *Cell* 2007; **131**(2)**:** 391-404.

9. Ping G, Qian W, Song G, Zhaochun S. Valsartan reverses depressive/anxiety-like behavior and induces hippocampal neurogenesis and expression of BDNF protein in unpredictable chronic mild stress mice. *Pharmacol Biochem Behav* 2014; **124:** 5-12.

10. Reznikov R, Diwan M, Nobrega JN, Hamani C. Towards a better preclinical model of PTSD: characterizing animals with weak extinction, maladaptive stress responses and low plasma corticosterone. *J Psychiatr Res* 2015; **61:** 158-165.

11. Porsolt RD, Bertin A, Jalfre M. Behavioral despair in mice: a primary screening test for antidepressants. *Arch Int Pharmacodyn Ther* 1977; **229**(2)**:** 327-336.

12. Armario A. The forced swim test: Historical, conceptual and methodological considerations and its relationship with individual behavioral traits. *Neurosci Biobehav Rev* 2021; **128:** 74-86.

Supplementary table 1: Scores of the ten dimension of SCL-90 in the total sample and the two groups (Mean ± SD)

| Scl-90 item | Heterosexual men (n=32) | Gay/Bisexual men (n=57) | t | *p* |
| --- | --- | --- | --- | --- |
| Total score | 103.70±16.49 | 170.60±59.30 | 6.230 | ＜0.001 |
| Somatization | 15.75±13.72 | 18.40±7.38 | 1.189 | 0.238 |
| Obsessive-compulsive | 13.19±4.28 | 23.02±7.50 | 6.807 | ＜0.001 |
| Interpersonal sensitivity | 10.78±2.57 | 18.93±7.43 | 5.990 | ＜0.001 |
| Depression | 14.88±3.34 | 27.67±11.22 | 6.279 | ＜0.001 |
| Anxiety | 11.44±1.78 | 18.89±8.41 | 4.942 | ＜0.001 |
| Hostility | 7.38±1.98 | 10.72±4.03 | 4.402 | ＜0.001 |
| Phobic anxiety | 7.21±0.44 | 10.98±4.34 | 4.843 | ＜0.001 |
| Paranoid ideation | 6.97±2.01 | 11.12±3.91 | 5.600 | ＜0.001 |
| Psychoticism | 10.69±1.23 | 17.84±7.11 | 5.635 | ＜0.001 |

Supplementary figure 1


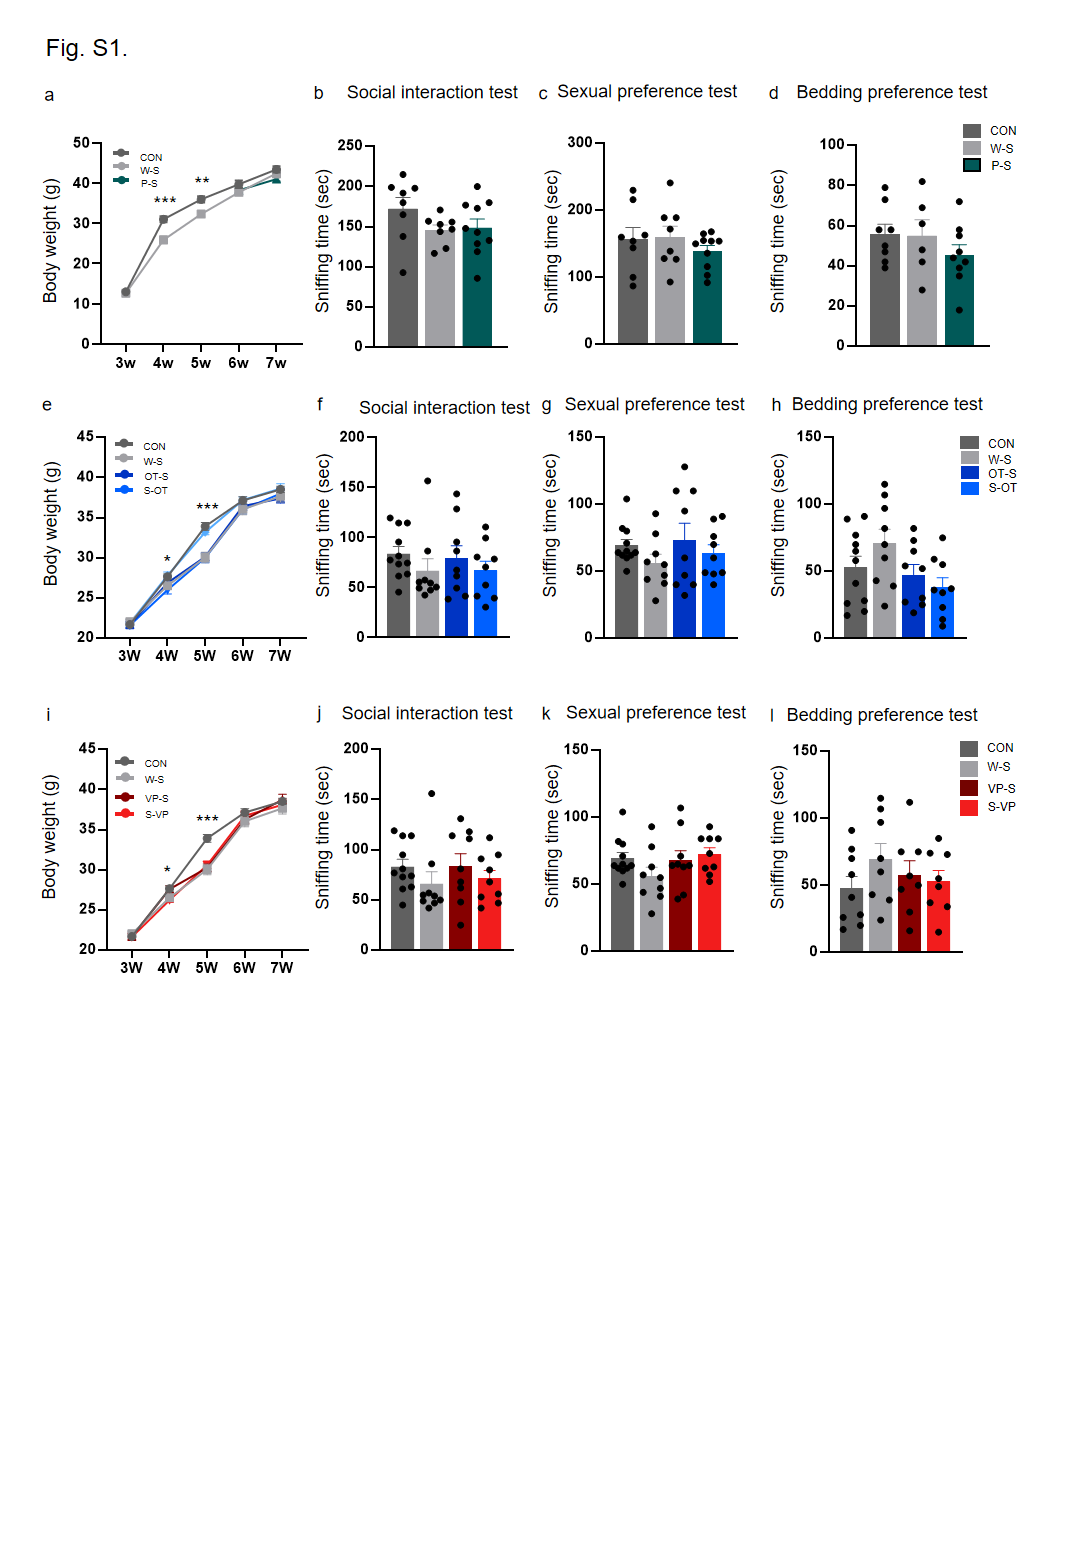


**Supplementary figure legends:**

**Supplementary figure 1. Whether early life stress or OT/AVT treatment has no effect on body weight and sniffing time of mice**

(A) The body weight was no changed among groups throughout the experiment. (B-D) There was no difference in sniffing time among groups in the SIT, SPT and BPT. (E) The body weight was no changed among groups in OT treatment experiment. (F-H) There was no difference in sniffing time among groups in the SIT, SPT and BPT. (I) The body weight was no changed among groups in AVP treatment experiment. (J-L) There was no difference in sniffing time among groups in the SIT, SPT and BPT.
